# Supplementary material for: A sub-picomolar assay for protein by using cubic Cu2O nanocages loaded with Au nanoparticles as robust redox probes and efficient non-enzymatic electrocatalysts
Source: Royal Society of Chemistry journal article supplement (doi:10.1039/c6an02599d), 2017-01-01
Supplement: c6an02599d1.pdf [file c6an02599d1.pdf]

**Supplementary Information:**

**Sub-picomolar assay for protein by using cubic Cu<sub>2</sub>O nanocages loaded with Au nanoparticles as robust redox probe and efficient nonenzymatic electrocatalysts**

Jianmin Zhao, Ting Zheng, Jiayi Gao, Shijing Guo, Xingxing Zhou and Wenju Xu\*

Key Laboratory of Luminescent and Real-Time Analytical Chemistry (Southwest University), Ministry of Education, School of Chemistry and Chemical Engineering, Southwest University, Chongqing, 400715, PR China

**Optimization of the experimental conditions**

The sensitivity and analytical performance of the developed aptasensor are influenced by the tested experimental conditions. Herein, the effect of the concentration of incubated SH-TBA, the incubation time of target TB, and the concentration of H<sub>2</sub>O<sub>2</sub> on the electrochemical response was investigated in 0.1 mol·L<sup>-1</sup> PBS containing 5 mmol·L<sup>-1</sup> [Fe(CN)<sub>6</sub>]<sup>3-/4-</sup>, and the results are shown in Fig. S1. From Fig. S1A and S1B, the resulting oxidative peak current in CV decreased with the increasing of SH-TBA concentration in the range of 0.5 μmol·L<sup>-1</sup> to 3.0 μmol·L<sup>-1</sup>, and levelled off at 2.5 μmol·L<sup>-1</sup>. Moreover, as shown in Fig. S1C and S1D, the extending of the incubation time of TB from 10 min to 50 min resulting in the gradual decrease of CV response, and reached to the maximum change at 40 min, which indicated the saturation of the specific bound between SH-TBA and TB. From the optimization results in Fig. S1E

and S1F, increasing of  $\text{H}_2\text{O}_2$  concentration in tested solution resulted in gradual rising of DPV response of the proposed aptasensor, until  $2.22 \text{ mmol}\cdot\text{L}^{-1}$  of  $\text{H}_2\text{O}_2$ . This suggested that  $\text{AuNPs}@Cu_2\text{O-NCs}$  as robust nonenzymatic electrocatalysts can efficiently catalyze the decomposition of  $\text{H}_2\text{O}_2$ , resulting in the significant enhancement of response signal. All the above observations demonstrated that the optimal measuring conditions were involved in  $2.5 \text{ }\mu\text{mol}\cdot\text{L}^{-1}$  SH-TBA, 40 min TB binding time, and  $2.22 \text{ mmol}\cdot\text{L}^{-1}$   $\text{H}_2\text{O}_2$  for the proposed aptasensor, respectively, which were all selected for the total experiments.

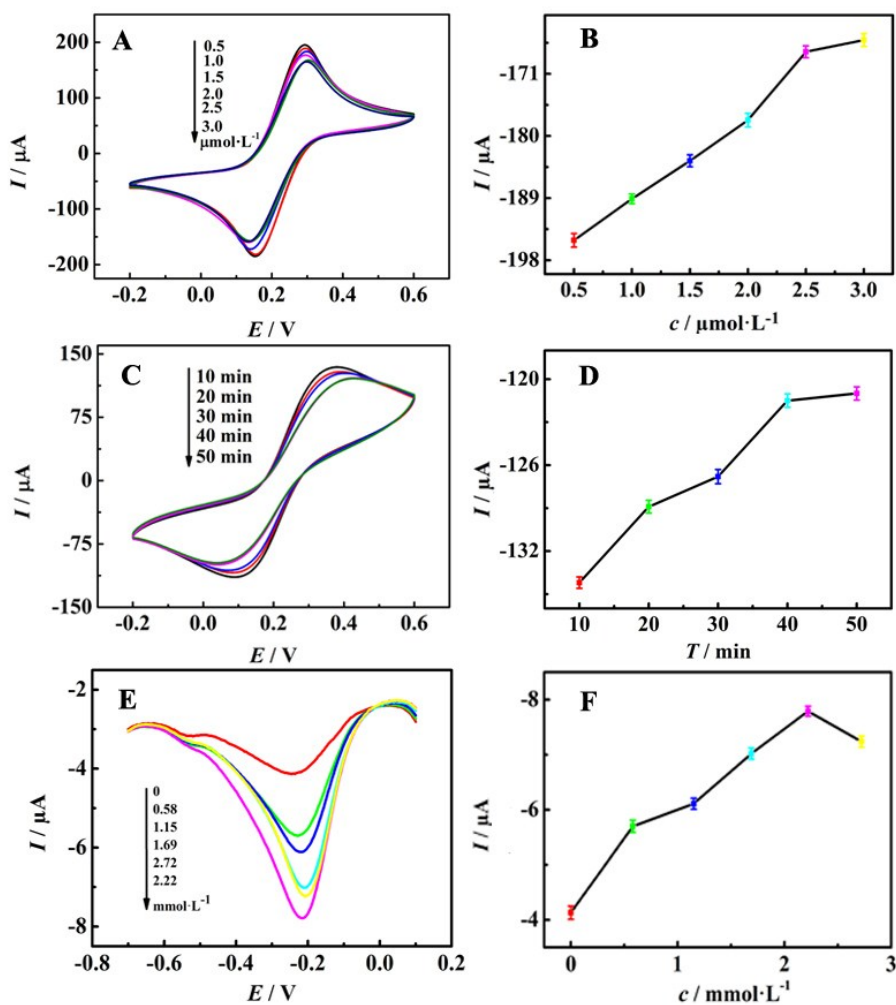

**Fig. S1** The effect of SH-TBA concentration (A and B), TB incubation time (C and D) and  $\text{H}_2\text{O}_2$  concentration (E and F) on the electrochemical response of the proposed

aptasensor. CV was measured in 5 mmol·L<sup>-1</sup> [Fe(CN)<sub>6</sub>]<sup>3-/4-</sup>, and DPV was measured in PBS containing certain concentration of H<sub>2</sub>O<sub>2</sub>. Error bars: SD, *n*=3.

**Table S1** Comparison of the analytical performance for different methodologies for TB

| Methods <sup>a</sup> | Strategies                                                 | Dynamic linear range (pmol·L <sup>-1</sup> ) | LOD (pmol·L <sup>-1</sup> ) | Ref.      |
|----------------------|------------------------------------------------------------|----------------------------------------------|-----------------------------|-----------|
| SERRS                | Single-step target binding to TBA                          | 1×10 <sup>2</sup> – 1×10 <sup>3</sup>        | 100                         | 3         |
| FRET                 | Noncovalent π-π stacking of dye labeled TBA on graphene    | 62.5 – 187.5                                 | 31.3                        | 4         |
| Colorimetry          | AuNPs and aptamer-thrombin recognition                     | 1×10 <sup>2</sup> – 1.5×10 <sup>4</sup>      | 100                         | 5         |
| EIS                  | Self-assembly of AuNPs and anti-TBA as recognition element | 1×10 <sup>2</sup> – 3×10 <sup>4</sup>        | 13                          | 6         |
| CV                   | Multiple ion channels embedded in polymeric membrane       | 3×10 <sup>3</sup> – 5×10 <sup>4</sup>        | 600                         | 8         |
| SWV                  | Target-induced conformational switching                    | 0 – 2×10 <sup>6</sup>                        | 16000                       | 9         |
| DPV                  | Sandwich-type, aptamer-functionalized magnetic beads       | 1×10 <sup>2</sup> – 1×10 <sup>5</sup>        | 450                         | 7         |
| DPV                  | Alkaline phosphatase decorated ZnO/Pt nanoflowers          | 5 – 1.5×10 <sup>4</sup>                      | 0.15                        | 10        |
| DPV                  | AuNPs@Cu <sub>2</sub> O-NCs                                | 0.1 – 1×10 <sup>4</sup>                      | 0.066                       | This work |

<sup>a</sup> SERRS: surface enhanced resonance Raman scattering; FRET: fluorescence resonance energy transfer; CV: cyclic voltammetry; SWV: square wave voltammetry.
